# Supplementary material for: Mechanical Characterization of 3D-Printed Patterned Membranes for Cardiac Tissue Engineering: An Experimental and Numerical Study
Source: MDPI journal article supplement (doi:10.3390/biomedicines11030963), 2023-03-21
Supplement: s1 [file s1]

# Supplementary Material

**Table S1.** Summary of the experimental parameters of the ten membranes (five vertical and five horizontal) used for the simulations and results of the simulation (elongation and Young’s modulus). The size of the filament was always 0.8 mm, the thickness of the membranes 1.85 mm and Young’s Modulus of the material 93.267 kPa.

| Type of Membrane | Sample | Length (mm) | Width (mm) | Force (N) | Elongation (mm) |           | Young's Modulus (kPa) |           |
|------------------|--------|-------------|------------|-----------|-----------------|-----------|-----------------------|-----------|
|                  |        |             |            |           | Experimental    | In Silico | Experimental          | In Silico |
| Vertical         | 1      | 46.87       | 13.61      | 0.236     | 9.385           | 9.728     | 45.154                | 49.598    |
|                  | 2      | 48.48       | 13.79      | 0.224     | 9.706           | 9.610     | 43.948                | 44.730    |
|                  | 3      | 52.15       | 14         | 0.227     | 10.459          | 10.352    | 44.196                | 44.344    |
|                  | 4      | 41.03       | 13.65      | 0.225     | 8.219           | 8.088     | 45.025                | 44.110    |
|                  | 5      | 48.61       | 13.25      | 0.235     | 9.737           | 10.051    | 45.905                | 48.068    |
| Horizontal       | 1      | 44.55       | 13.23      | 0.089     | 8.963           | 8.749     | 18.618                | 18.305    |
|                  | 2      | 50.67       | 13.48      | 0.107     | 10.135          | 11.814    | 18.304                | 21.228    |
|                  | 3      | 52.93       | 13.02      | 0.087     | 10.619          | 10.046    | 18.850                | 18.269    |
|                  | 4      | 56.39       | 14.02      | 0.088     | 11.126          | 10.828    | 17.354                | 18.142    |
|                  | 5      | 51.26       | 14.02      | 0.111     | 9.766           | 12.418    | 17.527                | 22.858    |

**Table S2.** Summary of the dimensions of the membranes and internal pores used for the simulations of the different patterns (each line represent a membrane with a specific pattern). The size of the filament was always 0.8 mm, the thickness of the membranes 1.85 mm, the maximum force 0.1 N and the Young’s Modulus of the material 93.267 kPa.

| Pores       |            | Membranes   |            | Number of Filaments             |                            | Results         |                       |
|-------------|------------|-------------|------------|---------------------------------|----------------------------|-----------------|-----------------------|
| Length (mm) | Width (mm) | Length (mm) | Width (mm) | Perpendicular to the Stretching | Parallel to the Stretching | Elongation (mm) | Young’s Modulus (kPa) |
| 1           | 1          | 89          | 17         | 50                              | 10                         | 5.684           | 48.952                |
| 1           | 2          | 89          | 17.6       | 50                              | 7                          | 8.130           | 33.895                |
| 1           | 3          | 89          | 19.8       | 50                              | 6                          | 9.596           | 25.735                |
| 1           | 4          | 89          | 20         | 50                              | 5                          | 11.533          | 21.308                |
| 1           | 5          | 89          | 18.2       | 50                              | 4                          | 14.355          | 18.674                |
| 1           | 6          | 89          | 21.2       | 50                              | 4                          | 14.485          | 15.889                |
| 1           | 7          | 89          | 24.2       | 50                              | 4                          | 14.622          | 13.897                |
| 1           | 8          | 89          | 18.4       | 50                              | 3                          | 19.485          | 13.636                |
| 1           | 9          | 89          | 20.4       | 50                              | 3                          | 19.125          | 12.194                |
| 1           | 10         | 89          | 22.4       | 50                              | 3                          | 19.745          | 11.040                |
| 1           | 0.5        | 89          | 19         | 50                              | 15                         | 3.862           | 64.862                |
| 2           | 1          | 82          | 17         | 30                              | 10                         | 5.445           | 47.358                |
| 2           | 2          | 82          | 17.6       | 30                              | 7                          | 7.943           | 31.368                |
| 2           | 3          | 82          | 19.8       | 30                              | 6                          | 9.308           | 24.048                |
| 2           | 4          | 82          | 20         | 30                              | 5                          | 10.895          | 20.591                |
| 2           | 5          | 82          | 18.2       | 30                              | 4                          | 14.076          | 17.586                |
| 2           | 6          | 82          | 21.2       | 30                              | 4                          | 13.671          | 15.223                |
| 2           | 7          | 82          | 24.2       | 30                              | 4                          | 14.165          | 13.137                |
| 2           | 8          | 82          | 18.4       | 30                              | 3                          | 18.973          | 12.870                |
| 2           | 9          | 82          | 20.4       | 30                              | 3                          | 18.423          | 11.664                |
| 2           | 10         | 82          | 22.4       | 30                              | 3                          | 18.542          | 10.672                |
| 2           | 0.5        | 82          | 19         | 30                              | 15                         | 3.702           | 62.856                |
| 3           | 1          | 92          | 17         | 25                              | 10                         | 6.246           | 46.037                |
| 3           | 2          | 92          | 17.6       | 25                              | 7                          | 9.005           | 31.379                |

|   |     |      |      |    |    |        |        |
|---|-----|------|------|----|----|--------|--------|
| 3 | 3   | 92   | 19.8 | 25 | 6  | 10.413 | 24.314 |
| 3 | 4   | 92   | 20   | 25 | 5  | 12.835 | 19.605 |
| 3 | 5   | 92   | 18.2 | 25 | 4  | 15.630 | 17.346 |
| 3 | 6   | 92   | 21.2 | 25 | 4  | 16.170 | 14.753 |
| 3 | 7   | 92   | 24.2 | 25 | 4  | 15.837 | 12.905 |
| 3 | 8   | 92   | 18.4 | 25 | 3  | 21.097 | 12.685 |
| 3 | 9   | 92   | 20.4 | 25 | 3  | 21.139 | 11.495 |
| 3 | 10  | 92   | 22.4 | 25 | 3  | 21.780 | 10.360 |
| 3 | 0.5 | 92   | 19   | 25 | 15 | 4.263  | 61.333 |
| 4 | 1   | 92   | 17   | 20 | 10 | 6.300  | 45.827 |
| 4 | 2   | 92   | 17.6 | 20 | 7  | 9.005  | 31.353 |
| 4 | 3   | 92   | 19.8 | 20 | 6  | 10.645 | 23.531 |
| 4 | 4   | 92   | 20   | 20 | 5  | 12.884 | 19.745 |
| 4 | 5   | 92   | 18.2 | 20 | 4  | 16.149 | 16.990 |
| 4 | 6   | 92   | 21.2 | 20 | 4  | 15.908 | 14.765 |
| 4 | 7   | 92   | 24.2 | 20 | 4  | 16.365 | 12.764 |
| 4 | 8   | 92   | 18.4 | 20 | 3  | 21.901 | 12.497 |
| 4 | 9   | 92   | 20.4 | 20 | 3  | 21.285 | 11.335 |
| 4 | 10  | 92   | 22.4 | 20 | 3  | 21.296 | 10.384 |
| 4 | 0.5 | 92   | 19   | 20 | 15 | 4.307  | 60.577 |
| 5 | 1   | 82   | 17   | 15 | 10 | 5.750  | 45.475 |
| 5 | 2   | 82   | 17.6 | 15 | 7  | 8.164  | 30.801 |
| 5 | 3   | 82   | 19.8 | 15 | 6  | 9.676  | 22.983 |
| 5 | 4   | 82   | 20   | 15 | 5  | 11.429 | 19.384 |
| 5 | 5   | 82   | 18.2 | 15 | 4  | 14.581 | 16.675 |
| 5 | 6   | 82   | 21.2 | 15 | 4  | 14.240 | 14.884 |
| 5 | 7   | 82   | 24.2 | 15 | 4  | 14.686 | 12.697 |
| 5 | 8   | 82   | 18.4 | 15 | 3  | 19.596 | 12.457 |
| 5 | 9   | 82   | 20.4 | 15 | 3  | 19.035 | 11.321 |
| 5 | 10  | 82   | 22.4 | 15 | 3  | 19.266 | 10.351 |
| 5 | 0.5 | 82   | 17   | 15 | 15 | 3.804  | 60.773 |
| 6 | 1   | 96   | 17   | 15 | 10 | 6.761  | 44.355 |
| 6 | 2   | 96   | 17.6 | 15 | 7  | 9.569  | 30.801 |
| 6 | 3   | 96   | 19.8 | 15 | 6  | 11.266 | 23.234 |
| 6 | 4   | 96   | 20   | 15 | 5  | 13.600 | 19.516 |
| 6 | 5   | 96   | 18.2 | 15 | 4  | 17.198 | 16.748 |
| 6 | 6   | 96   | 21.2 | 15 | 4  | 16.706 | 14.559 |
| 6 | 7   | 96   | 24.2 | 15 | 4  | 17.263 | 12.637 |
| 6 | 8   | 96   | 18.4 | 15 | 3  | 23.149 | 12.401 |
| 6 | 9   | 96   | 20.4 | 15 | 3  | 22.791 | 11.153 |
| 6 | 10  | 96   | 22.4 | 15 | 3  | 22.292 | 10.261 |
| 6 | 0.5 | 96   | 19   | 15 | 15 | 4.531  | 60.348 |
| 7 | 1   | 86.6 | 17   | 12 | 10 | 6.070  | 44.843 |
| 7 | 2   | 86.6 | 17.6 | 12 | 7  | 8.639  | 30.288 |
| 7 | 3   | 86.6 | 19.8 | 12 | 6  | 10.203 | 23.169 |
| 7 | 4   | 86.6 | 20   | 12 | 5  | 12.337 | 18.975 |
| 7 | 5   | 86.6 | 18.2 | 12 | 4  | 15.432 | 16.650 |
| 7 | 6   | 86.6 | 21.2 | 12 | 4  | 15.242 | 14.758 |
| 7 | 7   | 86.6 | 24.2 | 12 | 4  | 15.613 | 12.564 |
| 7 | 8   | 86.6 | 18.4 | 12 | 3  | 20.805 | 12.338 |
| 7 | 9   | 86.6 | 20.4 | 12 | 3  | 20.249 | 11.237 |

|     |     |      |      |    |    |        |        |
|-----|-----|------|------|----|----|--------|--------|
| 7   | 10  | 86.6 | 22.4 | 12 | 3  | 20.543 | 10.267 |
| 7   | 0.5 | 86.6 | 19   | 12 | 15 | 4.130  | 59.973 |
| 8   | 1   | 80   | 17   | 10 | 10 | 5.646  | 44.777 |
| 8   | 2   | 80   | 17.6 | 10 | 7  | 8.082  | 30.103 |
| 8   | 3   | 80   | 19.8 | 10 | 6  | 9.356  | 22.965 |
| 8   | 4   | 80   | 20   | 10 | 5  | 11.500 | 18.685 |
| 8   | 5   | 80   | 18.2 | 10 | 4  | 14.028 | 16.939 |
| 8   | 6   | 80   | 21.2 | 10 | 4  | 14.462 | 14.099 |
| 8   | 7   | 80   | 24.2 | 10 | 4  | 14.079 | 12.736 |
| 8   | 8   | 80   | 18.4 | 10 | 3  | 18.748 | 12.617 |
| 8   | 9   | 80   | 20.4 | 10 | 3  | 19.171 | 11.320 |
| 8   | 10  | 80   | 22.4 | 10 | 3  | 19.299 | 10.099 |
| 8   | 0.5 | 80   | 19   | 10 | 15 | 3.823  | 59.863 |
| 9   | 1   | 89   | 17   | 10 | 10 | 6.366  | 44.318 |
| 9   | 2   | 89   | 17.6 | 10 | 7  | 9.019  | 29.741 |
| 9   | 3   | 89   | 19.8 | 10 | 6  | 10.453 | 23.237 |
| 9   | 4   | 89   | 20   | 10 | 5  | 12.828 | 18.748 |
| 9   | 5   | 89   | 18.2 | 10 | 4  | 15.902 | 16.612 |
| 9   | 6   | 89   | 21.2 | 10 | 4  | 15.793 | 14.653 |
| 9   | 7   | 89   | 24.2 | 10 | 4  | 16.153 | 12.484 |
| 9   | 8   | 89   | 18.4 | 10 | 3  | 21.529 | 12.263 |
| 9   | 9   | 89   | 20.4 | 10 | 3  | 20.928 | 11.172 |
| 9   | 10  | 89   | 22.4 | 10 | 3  | 21.136 | 10.224 |
| 9   | 0.5 | 89   | 19   | 10 | 15 | 4.219  | 59.921 |
| 10  | 1   | 98   | 17   | 10 | 10 | 6.996  | 43.776 |
| 10  | 2   | 98   | 17.6 | 10 | 7  | 9.849  | 30.549 |
| 10  | 3   | 98   | 19.8 | 10 | 6  | 11.774 | 22.692 |
| 10  | 4   | 98   | 20   | 10 | 5  | 13.805 | 19.442 |
| 10  | 5   | 98   | 18.2 | 10 | 4  | 17.748 | 16.774 |
| 10  | 6   | 98   | 21.2 | 10 | 4  | 17.476 | 14.250 |
| 10  | 7   | 98   | 24.2 | 10 | 4  | 17.320 | 12.638 |
| 10  | 8   | 98   | 18.4 | 10 | 3  | 23.244 | 12.436 |
| 10  | 9   | 98   | 20.4 | 10 | 3  | 23.865 | 11.076 |
| 10  | 10  | 98   | 22.4 | 10 | 3  | 23.599 | 10.057 |
| 10  | 0.5 | 98   | 19   | 10 | 15 | 4.632  | 59.805 |
| 0.5 | 1   | 90.5 | 17   | 70 | 10 | 5.558  | 51.688 |
| 0.5 | 2   | 90.5 | 17.6 | 70 | 7  | 7.959  | 35.698 |
| 0.5 | 3   | 90.5 | 19.8 | 70 | 6  | 9.408  | 26.640 |
| 0.5 | 4   | 90.5 | 20   | 70 | 5  | 11.172 | 21.671 |
| 0.5 | 5   | 90.5 | 18.2 | 70 | 4  | 14.464 | 18.868 |
| 0.5 | 6   | 90.5 | 21.2 | 70 | 4  | 13.937 | 16.329 |
| 0.5 | 7   | 90.5 | 24.2 | 70 | 4  | 14.319 | 14.202 |
| 0.5 | 8   | 90.5 | 18.4 | 70 | 3  | 19.796 | 13.610 |
| 0.5 | 9   | 90.5 | 20.4 | 70 | 3  | 19.575 | 12.321 |
| 0.5 | 10  | 90.5 | 22.4 | 70 | 3  | 18.890 | 11.330 |
| 0.5 | 0.5 | 90.5 | 19   | 70 | 15 | 3.741  | 69.097 |
